# Supplementary material
Source: MDPI journal article supplement (https://www.mdpi.com/2076-3417/12/4/1932)
Supplement: s1 [file s1]

# Untargeted <sup>1</sup>H-NMR Urine Metabolomic Analysis of Preterm Infants with Neonatal Sepsis

Panagiota D. Georgiopoulou <sup>1</sup>, Styliani A. Chasapi <sup>1</sup>, Irene Christopoulou <sup>2</sup>, Anastasia Varvarigou <sup>2,\*</sup> and Georgios A. Spyroulias <sup>1,\*</sup>

<sup>1</sup> Department of Pharmacy, University of Patras, 26504 Patras, Greece; pennygeo5@gmail.com (P.D.G.); stella.chimic@gmail.com (S.A.C.)

<sup>2</sup> Department of Paediatrics, University of Patras Medical School, General University Hospital, 26500 Patras, Greece; christop\_irini@yahoo.gr

\* Correspondence: varvarigou@upatras.gr (A.V.); g.a.spyroulias@upatras.gr (G.A.S.)

## Supplementary materials

**Table S1.** <sup>1</sup> H NMR Chemical Shifts of Metabolites detected in urine samples of neonates and their main metabolic pathway.

|     | Metabolites          | δ <sub>H</sub> (ppm) and multiplicity            | Pathway                                                                                 |
|-----|----------------------|--------------------------------------------------|-----------------------------------------------------------------------------------------|
| 1.  | 1-Methylnicotinamide | 4.46 (s), 8.17 (m), 8.88 (d), 8.95 (d), 9.26 (s) | Nicotinate and Nicotinamide metabolism                                                  |
| 2.  | 2-Hydroxybutyrate    | 0.89 (t), 1.66 (m)                               | Propanoate metabolism                                                                   |
| 3.  | 2-Hydroxyisobutyrate | 1.35 (s)                                         | Amino acid degradation and ketogenesis                                                  |
| 4.  | 2-Oxoglutarate       | 2.99 (t), 2.43 (t)                               | Amino acids metabolism                                                                  |
| 5.  | 4-Hydroxybenzoate    | 6.96 (d), 7.75 (d)                               | Phenylalanine metabolism                                                                |
| 6.  | Acetate              | 1.92 (s)                                         | Pyruvate metabolism                                                                     |
| 7.  | Acetone              | 2.22 (s)                                         | 2-propanol and Ketone body metabolism                                                   |
| 8.  | Alanine              | 1.46 (d)                                         | Urea, Glucose-Alanine cycle                                                             |
| 9.  | Ascorbate            | 3.72 (m), 3.75 (m), 4.02 (m), 4.53 (d)           | Vitamin digestion and absorption, Biosynthesis of cofactors, Tyrosine metabolism        |
| 10. | Betaine              | 3.25 (s), 3.88 (s)                               | Glycine, serine and threonine metabolism                                                |
| 11. | Choline              | 3.19 (s), 3.50 (m), 4.05 (m)                     | Cell membrane synthesis-one carbon metabolism, Glycine, serine and threonine metabolism |
| 12. | Citrate              | 2.56 (d), 2.68 (d)                               | Citrate cycle                                                                           |
| 13. | Creatine             | 3.025 (s), 3.91 (s)                              | Glycine, serine and threonine metabolism                                                |
| 14. | Creatinine           | 3.04 (s), 4.06 (s)                               | Creatine catabolism                                                                     |
| 15. | Cysteine             | 3.19 (dd), 3.39 (dd)                             | Cysteine and methionine metabolism                                                      |
| 16. | Dimethylamine        | 2.71 (s)                                         | Choline metabolism                                                                      |

|     |                             |                                                                                            |                                                                                                                                      |
|-----|-----------------------------|--------------------------------------------------------------------------------------------|--------------------------------------------------------------------------------------------------------------------------------------|
| 17. | Ethanol                     | 1.17 (t)                                                                                   | Ethanol degradation                                                                                                                  |
| 18. | Ethanolamine                | 3.13 (t), 3.13 (t)                                                                         | Glycerophospholipid metabolism                                                                                                       |
| 19. | Formate                     | 8.44 (s)                                                                                   | Glyoxylate and dicarboxylate metabolism                                                                                              |
| 20. | Fumarate                    | 6.52 (s)                                                                                   | Arginine biosynthesis, Citrate cycle                                                                                                 |
| 21. | Gluconate                   | 3.65 (m), 3.77 (m), 3.82(m), 4.02 (m), 4.12 (d)                                            | Pentose Phosphate Pathway                                                                                                            |
| 22. | Glucose                     | 3.40 (m), 3.45 (m), 3.48 (m), 3.52 (dd), 3.70 (m), 3.83 (m), 3.89 (dd), 4.63 (d), 5.22 (d) | Glycolysis / Gluconeogenesis                                                                                                         |
| 23. | Glycine                     | 3.55 (s)                                                                                   | Nitrogen metabolism                                                                                                                  |
| 24. | Hippurate                   | 7.53 (m) , 7.62 (m), 7.82 (d), 4.97 (d)                                                    | Phenylalanine/ Phenolics metabolism                                                                                                  |
| 25. | Hypoxanthine                | 8.18 (s), 8.20 (s)                                                                         | Purine metabolism                                                                                                                    |
| 26. | Isobutyrate                 | 1.08(s)                                                                                    | Biphenyl degradation                                                                                                                 |
| 27. | Lactate                     | 1.31 (d)                                                                                   | Glycolysis / Gluconeogenesis, Pyruvate metabolism                                                                                    |
| 28. | Lactose                     | 4.44 (d), 4.67(d), 5.24 (d)                                                                | Lactose synthesis, Galactose metabolism                                                                                              |
| 29. | Levulinate                  | 2.22 (s), 2.43 (t), 2.74 (t)                                                               | Secondary metabolism                                                                                                                 |
| 30. | Lysine                      | 1.71 (m), 1.90 (m), 3.02 (t), 3.76 (t)                                                     | Protein digestion and absorption & Biotin metabolism                                                                                 |
| 31. | Mannose                     | 5.17 (d), 4.89 (d)                                                                         | Galactose metabolism, Fructose & mannose metabolism                                                                                  |
| 32. | <i>myo</i> -inositol        | 3.26 (t), 3.52 (dd), 3.62(t), 4.05 (t)                                                     | Galactose and Inositol phosphate metabolism, ABC transporters, Phosphatidylinositol signaling system, Ascorbate/ alderate metabolism |
| 33. | <i>N, N</i> Dimethylglycine | 2.91 (s)                                                                                   | Glycine, serine and threonine metabolism                                                                                             |
| 34. | Oxypurinol                  | 8.31 (s)                                                                                   | Purine metabolism                                                                                                                    |
| 35. | Propylene glycol            | 1.13 (d), 3.44 (dd), 3.54 (dd)                                                             | Pyruvate metabolism                                                                                                                  |
| 36. | Pyruvate                    | 2.36 (s)                                                                                   | Urea cycle, Pyruvate metabolism                                                                                                      |
| 37. | Succinate                   | 2.47 (s)                                                                                   | Citric Acid Cycle                                                                                                                    |
| 38. | Taurine                     | 3.25 (t), 3.42 (t)                                                                         | Taurine and Hypotaurine Metabolism, Primary bile acid biosynthesis                                                                   |
| 39. | Threonine                   | 1.31 (d), 3.58 (d), 4.25 (m)                                                               | Protein digestion and absorption, Biosynthesis of                                                                                    |

|     |                |                                           |                                                                              |
|-----|----------------|-------------------------------------------|------------------------------------------------------------------------------|
|     |                |                                           | amino acids and Glycine, serine and threonine metabolism                     |
| 40. | Trigonelline   | 8.07(m), 8.92 (m), 9.02 (m), 9.11 (s, br) | Nicotinate and nicotinamide metabolism                                       |
| 41. | Trimethylamine | 2.86 (s)                                  | Oxide, choline and carnitine metabolism                                      |
| 42. | Tyrosine       | 6.88 (m), 7.17 (m)                        | Phenylalanine, tyrosine and tryptophan biosynthesis                          |
| 43. | Urea           | 5.8 (s, br)                               | Urea cycle, Arginine and proline metabolism                                  |
| 44. | Valine         | 0.97 (d), 1.03 (d), 2.23 (m), 3.59 (d)    | Protein digestion and absorption, Valine, leucine and isoleucine degradation |
| 45. | Xanthine       | 7.97 (s)                                  | Purine metabolism                                                            |

\* s, singlet; d, doublet; dd, double doublet; t, triplet; q, quartet; m, multiplet; br, broad.

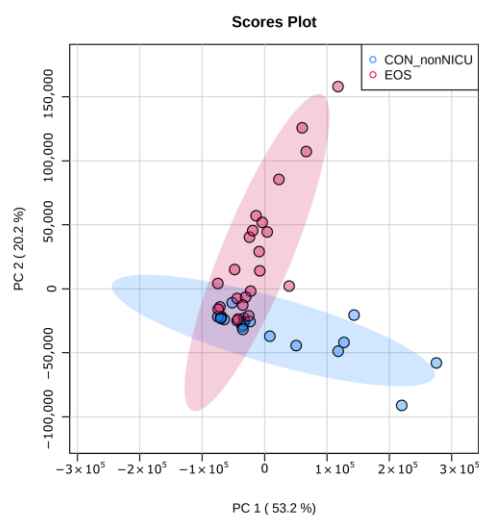

(a)

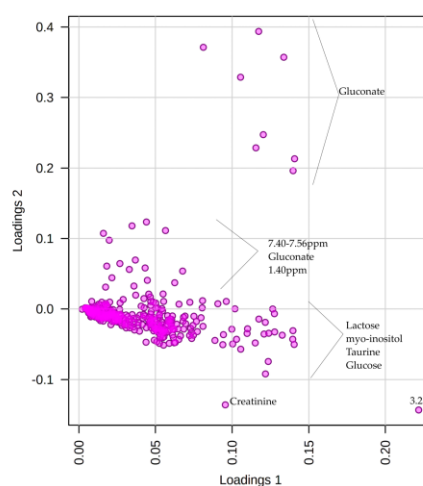

(b)

**Figure S1. Scores and loadings plot of PCA for NMR data belonging to neonates diagnosed with EOS (pink circles) and healthy neonates without need for NICU hospitalization (blue circles). (a) PCA scores plot of the EOS and healthy non-NICU preterms . (b) Loadings plot of PC1 and PC2.**

## STOCSY 1D

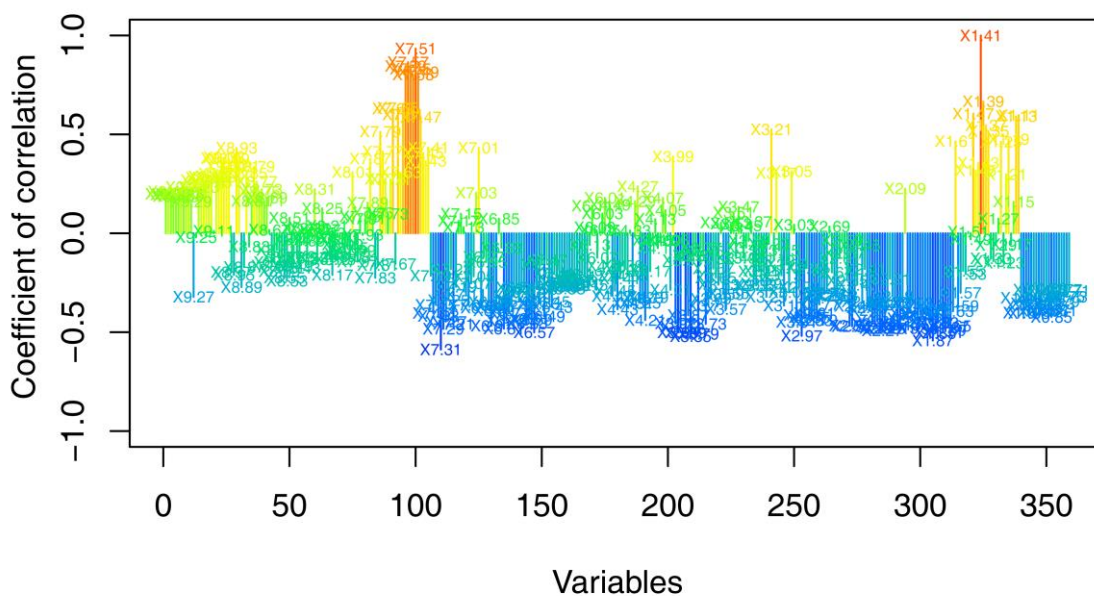

**Figure S2.** 1D-STOCY pseudo-NMR spectrum of correlation coefficients to the other signals in the median urine NMR spectrum and maximum intensity correlation of peaks are color encoded and projected into statistical difference spectra: “driver peak” was set the one at 1.41 ppm.

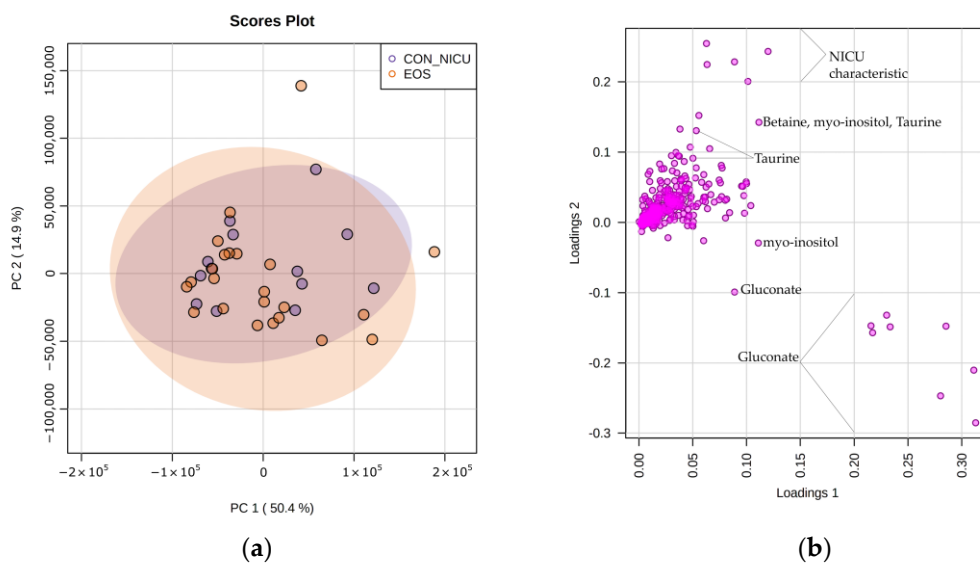

**Figure S3. Scores and loadings plot of PCA for NMR data belonging to neonates diagnosed with EOS (orange circles) and neonates hospitalized in NICU without EOS (purple circles). (a) PCA scores plot of the EOS and control group. (b) Loadings plot of PC1 and PC2.**

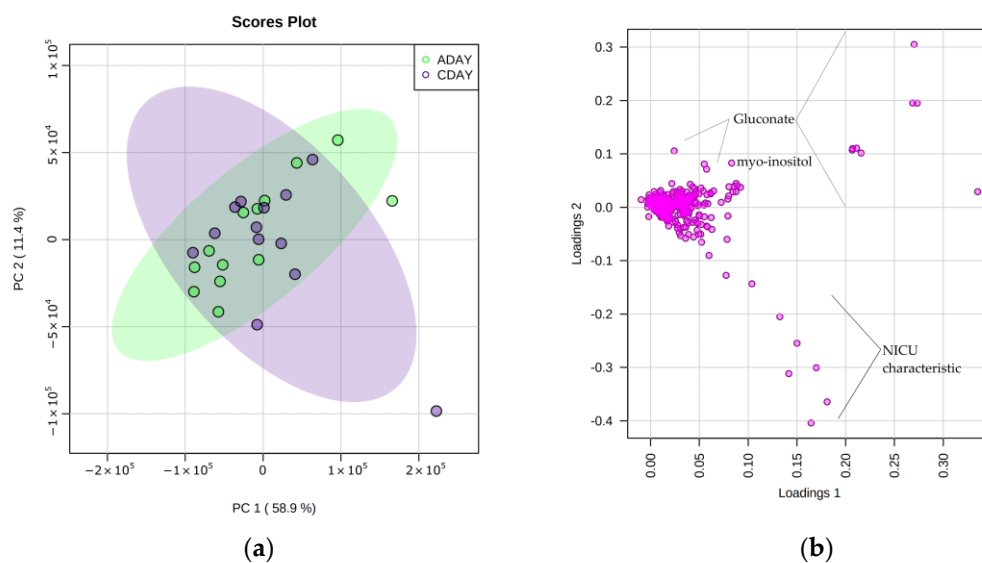

**Figure S4. Scores and loadings plot of PCA for NMR data belonging to urine samples of neonates diagnosed with EOS the first (green circles) and the third day (blue circles) of their life. (a) PCA scores plot of the first- and third-day's samples. (b) Loadings plot of PC1 and PC2.**

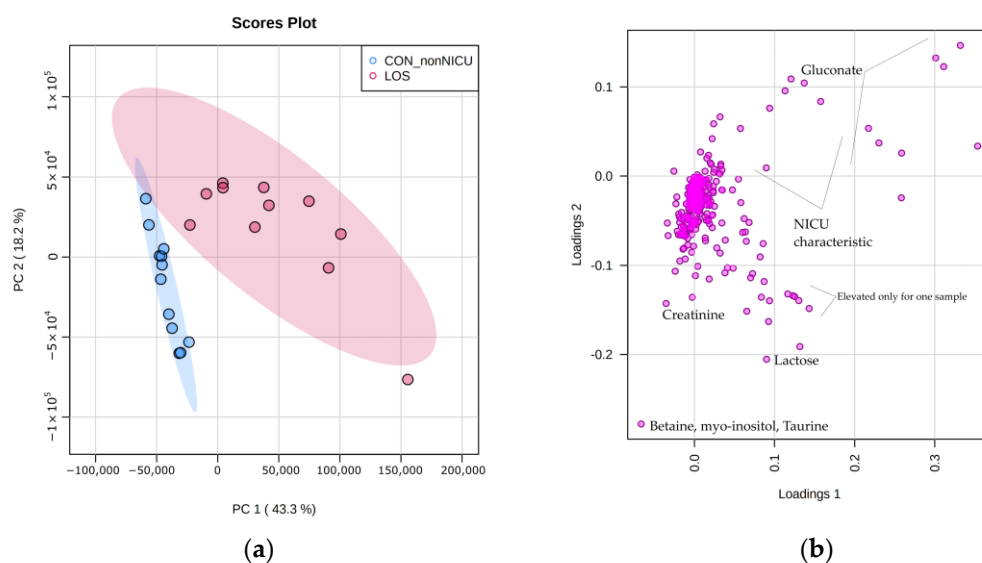

**Figure S5. Scores and loadings plot of PCA for NMR data belonging to neonates diagnosed with LOS (pink circles) and control neonates without need for hospitalization (blue circles). (a) PCA scores plot of the LOS and healthy non-NICU preterms without need for hospitalization. (b) Loadings plot of PC1 and PC2.**

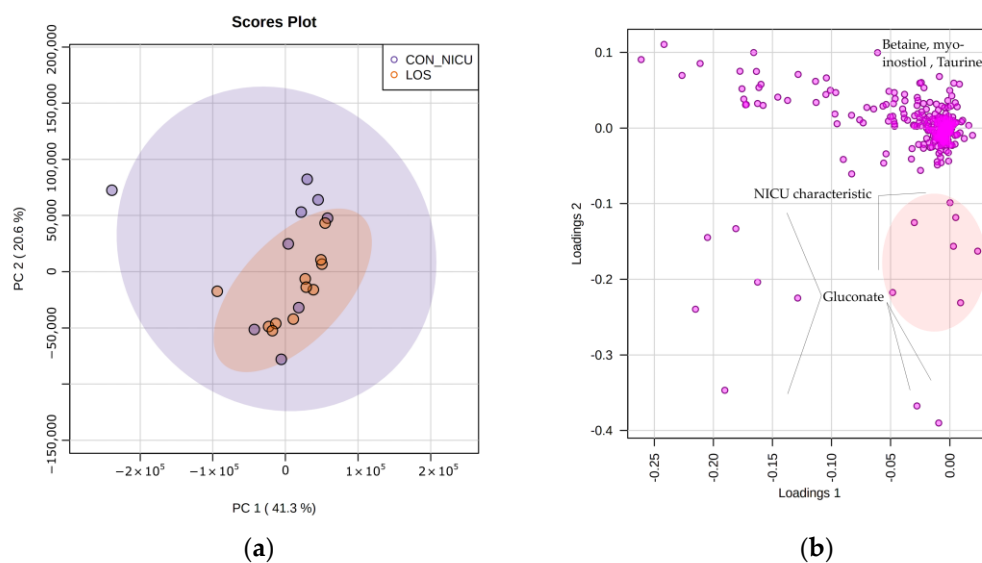

Figure S6. Scores and loadings plot of PCA for NMR data belonging to neonates diagnosed with LOS (orange circles) and control neonates of NICU (purple circles). (a) PCA scores plot of the LOS and control group. (b) Loadings plot of PC1 and PC2.

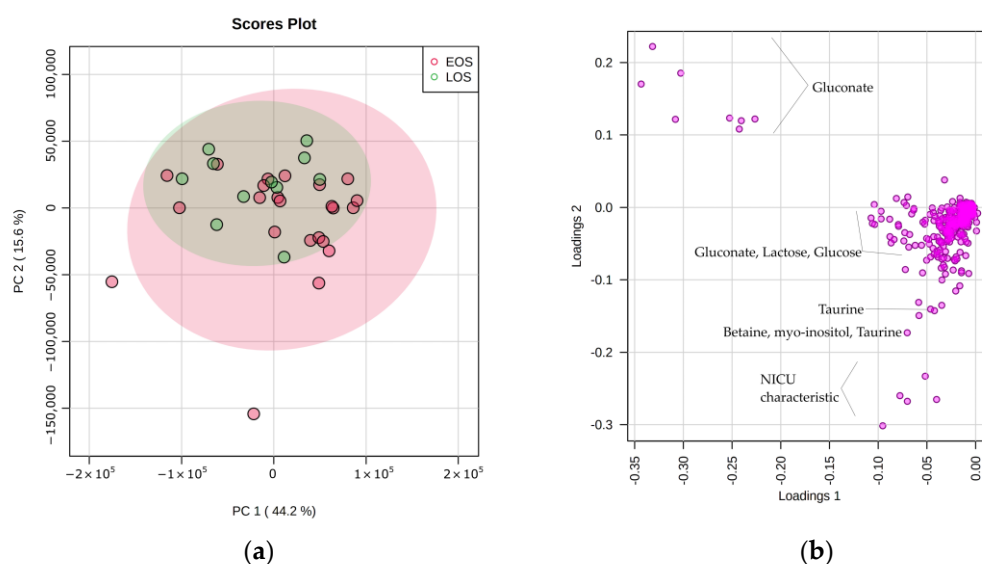

Figure S7. Scores and loadings plot of PCA for NMR data belonging to urine samples of neonates diagnosed with EOS (red circles) and neonates with LOS (green circles). (a) PCA scores plot of EOS and LOS group. (b) Loadings plot of PC1 and PC2.

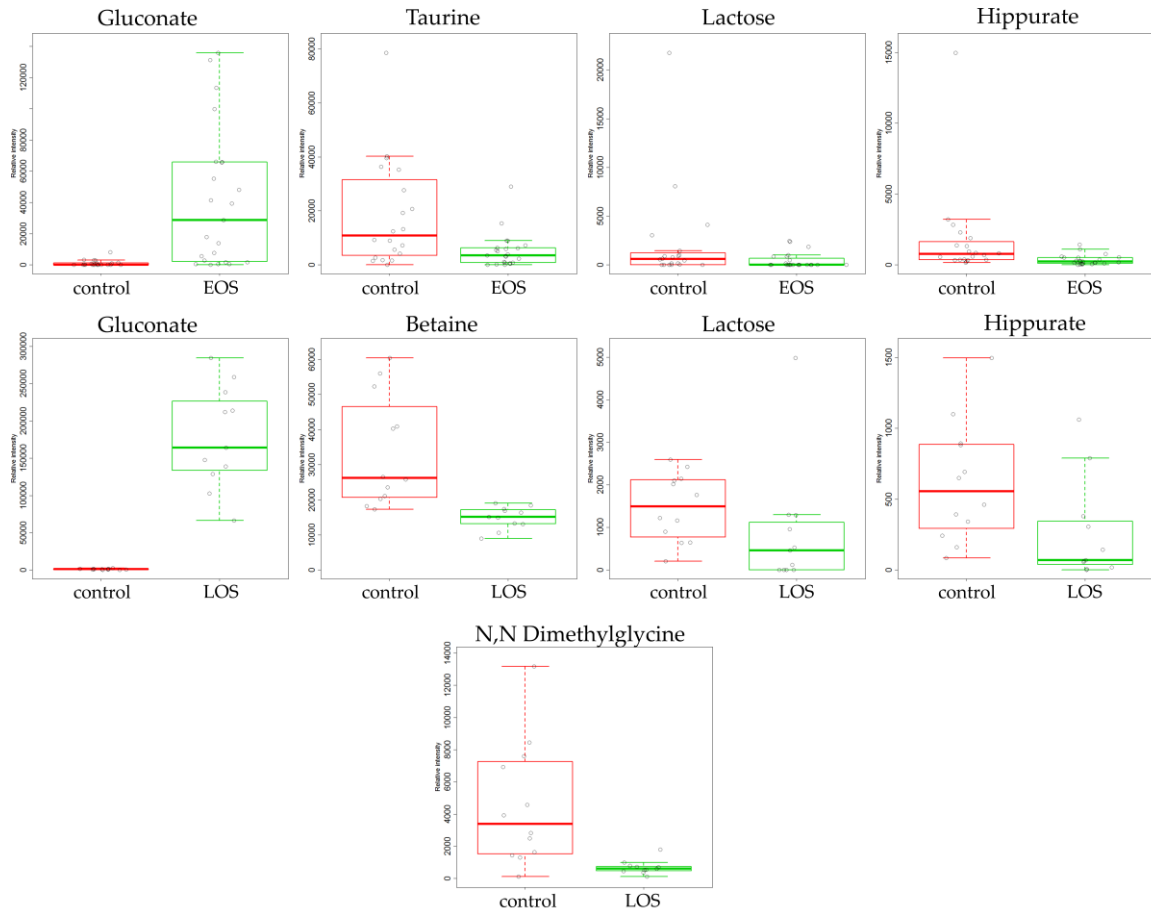

**Figure S8.** Box plots of the statistically significant metabolites highlighted from univariate analysis with  $p$ -value $<0.05$ , between healthy control non-NICU neonates, LOS and EOS groups.

**Table S2.** Detailed results from the pathway analysis of the EOS group's significant metabolites.

| Pathway name                             | Metabolites  | p-value  | Pathway impact |
|------------------------------------------|--------------|----------|----------------|
| Ascorbate/ alderate metabolism           | myo-inositol | 0.040642 | 0.0            |
| Taurine/ Hypotaurine metabolism          | Taurine      | 0.040642 | 0.42857        |
| Phenylalanine Metabolism                 | Hippurate    | 0.050574 | 0.0            |
| Pentose Phosphate Pathway                | Gluconate    | 0.1083   | 0.04712        |
| Glycolysis/Gluconeogenesis               | Glucose      | 0.12684  | 2.1E-4         |
| Galactose metabolism                     | myo-inositol | 0.13143  | 0.0            |
| Phosphatidylinositol signaling system    | myo-inositol | 0.13599  | 0.03736        |
| Inositol phosphate metabolism            | myo-inositol | 0.14505  | 0.12939        |
| Glycine/ serine and threonine metabolism | Betaine      | 0.15849  | 0.05034        |
| Primary bile acid biosynthesis           | Taurine      | 0.2146   | 0.00758        |

**Table S3.** Detailed results from the pathway analysis of the LOS group's significant metabolites.

| Pathway name                             | Metabolites                     | p-value  | Pathway impact |
|------------------------------------------|---------------------------------|----------|----------------|
| Glycine/ serine and threonine metabolism | Betaine, N,N<br>Dimethylglycine | 0.011364 | 0.12294        |
| Ascorbate/ alderate metabolism           | myo-inositol                    | 0.040642 | 0.0            |
| Taurine/ Hypotaurine metabolism          | Taurine                         | 0.040642 | 0.42857        |
| Phenylalanine Metabolism                 | Hippurate                       | 0.050574 | 0.0            |
| Pentose Phosphate Pathway                | Gluconate                       | 0.1083   | 0.04712        |
| Galactose metabolism                     | myo-inositol                    | 0.13143  | 0.0            |
| Phosphatidylinositol signaling system    | myo-inositol                    | 0.13599  | 0.03736        |
| Inositol phosphate metabolism            | myo-inositol                    | 0.14505  | 0.12939        |
| Primary bile acid biosynthesis           | Taurine                         | 0.2146   | 0.00758        |
